# Supplementary material
Source: publisher site journal article supplement (https://www.spandidos-publications.com/5065/downloadSupplementary)
Supplement: Supplementary file 1 [file downloadSupplementary]

## Sheet: Sheet1
Table SVI. Gene set enrichment KEGG analysis results based on the risk signature.
Name	GS<br> follow link to MSigDB	GS details	Size	ES	NES	NOM P-value	FDR q-value	FWER P-value	Rank at max	Leading edge
KEGG_PENTOSE_PHOSPHATE_PATHWAY	KEGG_PENTOSE_PHOSPHATE_PATHWAY	Details ...	27	0.595144	1.67878	0.00779727	0.291962	0.361	8315	tags=59%, list=15%, signal=70%
KEGG_GLYCOLYSIS_GLUCONEOGENESIS	KEGG_GLYCOLYSIS_GLUCONEOGENESIS	Details ...	62	0.511918	1.64002	0.00811359	0.313117	0.445	8571	tags=50%, list=15%, signal=59%
KEGG_P53_SIGNALING_PATHWAY	KEGG_P53_SIGNALING_PATHWAY	Details ...	68	0.533976	1.72516	0.00957854	0.26976	0.263	4554	tags=46%, list=8%, signal=50%
KEGG_PROTEASOME	KEGG_PROTEASOME	Details ...	46	0.737132	1.7521	0.0132576	0.399823	0.219	6884	tags=72%, list=12%, signal=82%
KEGG_DRUG_METABOLISM_OTHER_ENZYMES	KEGG_DRUG_METABOLISM_OTHER_ENZYMES	Details ...	51	0.494948	1.49943	0.0329218	0.470732	0.745	10345	tags=53%, list=19%, signal=65%
KEGG_GLYCOSPHINGOLIPID_BIOSYNTHESIS_LACTO_AND_NEOLACTO_SERIES	KEGG_GLYCOSPHINGOLIPID_BIOSYNTHESIS_LACTO_AND_NEOLACTO_SERIES	Details ...	26	0.512338	1.58843	0.0355731	0.385367	0.564	7323	tags=58%, list=13%, signal=66%
KEGG_TIGHT_JUNCTION	KEGG_TIGHT_JUNCTION	Details ...	132	0.420296	1.48358	0.0364372	0.416995	0.771	5307	tags=37%, list=10%, signal=41%
KEGG_THYROID_CANCER	KEGG_THYROID_CANCER	Details ...	29	0.536499	1.52132	0.0517928	0.467751	0.711	3554	tags=41%, list=6%, signal=44%
KEGG_PATHOGENIC_ESCHERICHIA_COLI_INFECTION	KEGG_PATHOGENIC_ESCHERICHIA_COLI_INFECTION	Details ...	56	0.530354	1.53888	0.054717	0.477431	0.67	2615	tags=39%, list=5%, signal=41%
KEGG_NEUROACTIVE_LIGAND_RECEPTOR_INTERACTION	KEGG_NEUROACTIVE_LIGAND_RECEPTOR_INTERACTION	Details ...	270	-0.539209	-1.8763	0	0.0837269	0.055	16505	tags=65%, list=30%, signal=92%
KEGG_CALCIUM_SIGNALING_PATHWAY	KEGG_CALCIUM_SIGNALING_PATHWAY	Details ...	178	-0.483675	-1.67767	0.00191205	0.484749	0.367	8852	tags=43%, list=16%, signal=51%
KEGG_GLYCINE_SERINE_AND_THREONINE_METABOLISM	KEGG_GLYCINE_SERINE_AND_THREONINE_METABOLISM	Details ...	31	-0.578804	-1.65969	0.0102669	0.388305	0.411	14180	tags=61%, list=26%, signal=82%
KEGG_TASTE_TRANSDUCTION	KEGG_TASTE_TRANSDUCTION	Details ...	51	-0.526408	-1.62655	0.0134875	0.39614	0.478	18379	tags=65%, list=33%, signal=97%
KEGG_VASCULAR_SMOOTH_MUSCLE_CONTRACTION	KEGG_VASCULAR_SMOOTH_MUSCLE_CONTRACTION	Details ...	115	-0.454351	-1.52609	0.0261044	0.568496	0.671	9601	tags=39%, list=17%, signal=47%
KEGG_TRYPTOPHAN_METABOLISM	KEGG_TRYPTOPHAN_METABOLISM	Details ...	40	-0.491549	-1.55766	0.0366599	0.541147	0.622	11718	tags=43%, list=21%, signal=54%
KEGG_LONG_TERM_DEPRESSION	KEGG_LONG_TERM_DEPRESSION	Details ...	70	-0.420538	-1.42179	0.0446602	0.475143	0.83	12663	tags=47%, list=23%, signal=61%
KEGG_TYPE_II_DIABETES_MELLITUS	KEGG_TYPE_II_DIABETES_MELLITUS	Details ...	47	-0.490726	-1.5096	0.0475285	0.478025	0.696	11295	tags=51%, list=20%, signal=64%
KEGG, Kyoto Encyclopedia of Genes and Genomes;
